# Supplementary material for: Strain-specific Fibril Propagation by an Aβ Dodecamer
Source: PubMed Central journal article supplement (PMC5241678; doi:10.1038/srep40787), 2017-01-18
Supplement: srep40787-s1.pdf [file srep40787-s1.pdf]

# Strain-specific Fibril Propagation by an A $\beta$ Dodecamer

Dexter N. Dean<sup>1</sup>, Pradipta K. Das<sup>2</sup>, Pratip Rana<sup>3</sup>, Franklin Burg<sup>4</sup>, Yona Levites<sup>4</sup>, Sarah E.

Morgan<sup>2</sup>, Preetam Ghosh<sup>3</sup>, and Vijayaraghavan Rangachari<sup>1\*</sup>

<sup>1</sup>Department of Chemistry and Biochemistry, University of Southern Mississippi, Hattiesburg,

MS 39406

<sup>2</sup>School of Polymers and High Performance Materials, University of Southern Mississippi,

Hattiesburg, MS 39406

<sup>3</sup>Department of Computer Science, Virginia Commonwealth University, Richmond, VA 23284

<sup>4</sup>Center for Translational Research in Neurodegenerative Disease, University of Florida,

Gainesville, FL 32611

**SUPPLEMENTAL INFORMATION**

**SUPPLEMENTARY FIGURE 1**

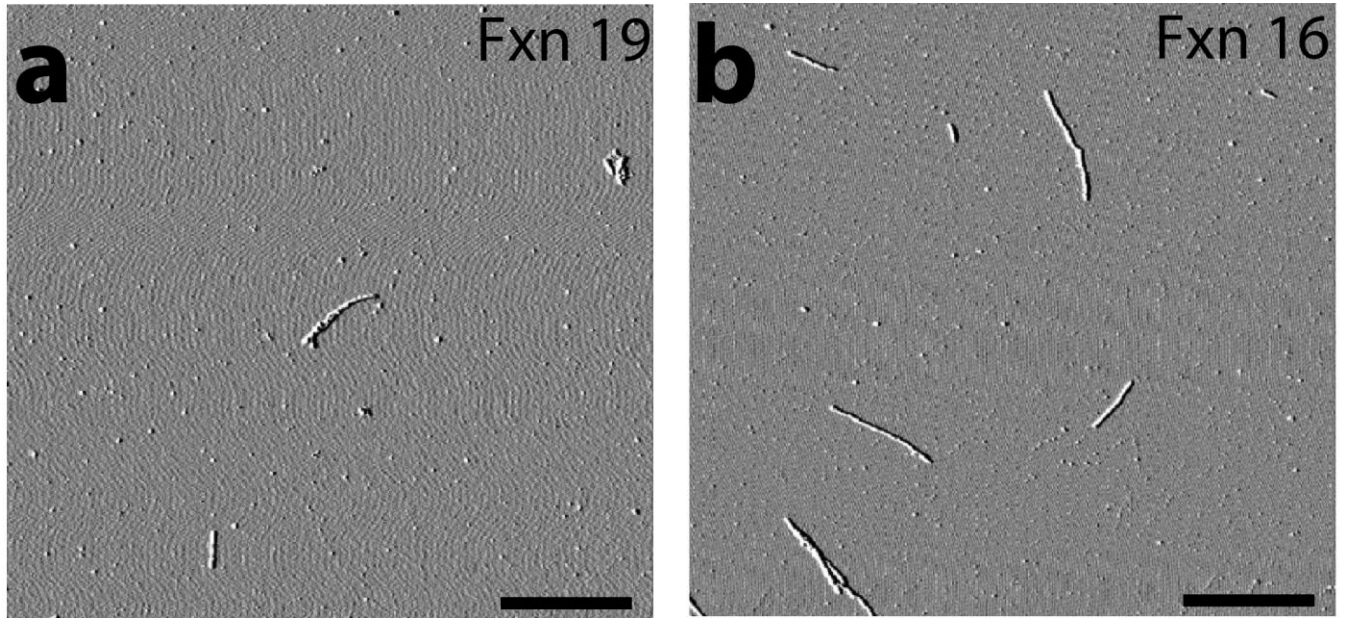

**Supplementary Figure 1: AFM of sLFAO aggregate peaks from SEC.** Representative AFM images of fractions 16 (**a**) and 19 (**b**) from sLFAO at 7 days of incubation. Scale bar represents 1  $\mu\text{m}$ .

## SUPPLEMENTARY FIGURE 2

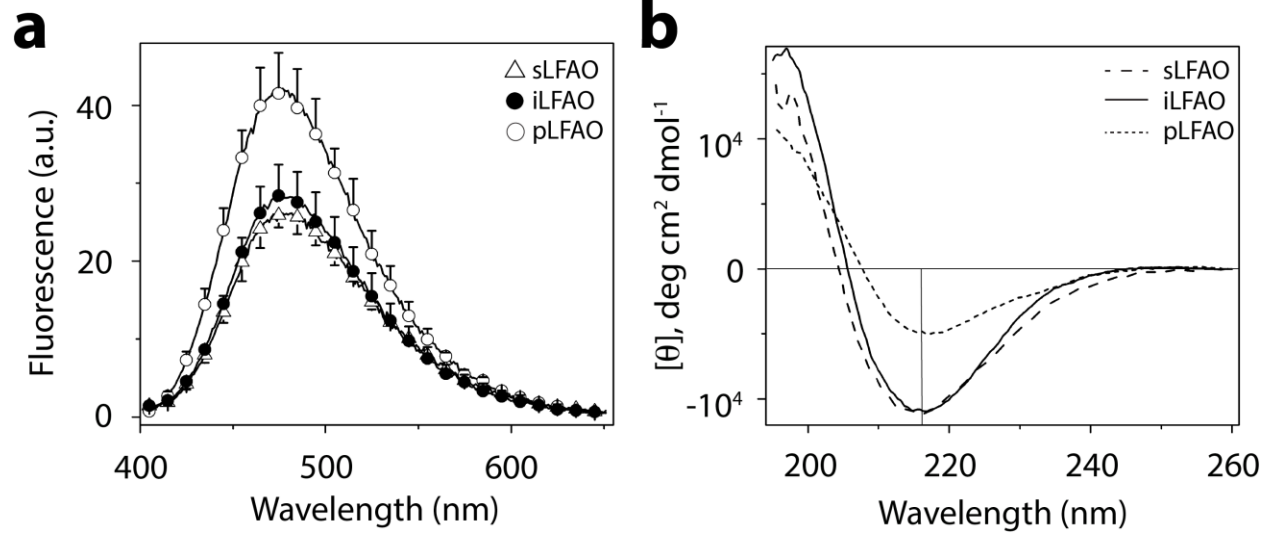

### Supplementary Figure 2: Biophysical comparison of pLFAOs, iLFAOs and sLFAOs.

(a) ANS (100  $\mu\text{M}$ ) fluorescence scans of 10  $\mu\text{M}$  sLFAO ( $\Delta$ ), iLFAO ( $\bullet$ ), and pLFAO ( $\circ$ ), respectively. Samples were equilibrated 1 m before measuring fluorescence using an excitation of 388 nm and scanning emission between 405 and 650 nm. (b) Circular dichroism spectra for 10  $\mu\text{M}$  sLFAO (dashed), iLFAO (solid), and pLFAO (dotted), suggesting a  $\beta$ -sheet secondary structure (minima at 217 nm).
